# Supplementary material
Source: PubMed Central journal article supplement (PMC6647032)
Supplement: NIHMS1036337-supplement-Appendix.pdf [file NIHMS1036337-supplement-Appendix.pdf]

## Supplementary Digital Content

**Figure A. Trends in the Number of Total and Main Partners in the Past 12 Months among Men Who Have Sex With Men—National HIV Behavioral Surveillance, 21 cities, United States, 2008-2014**

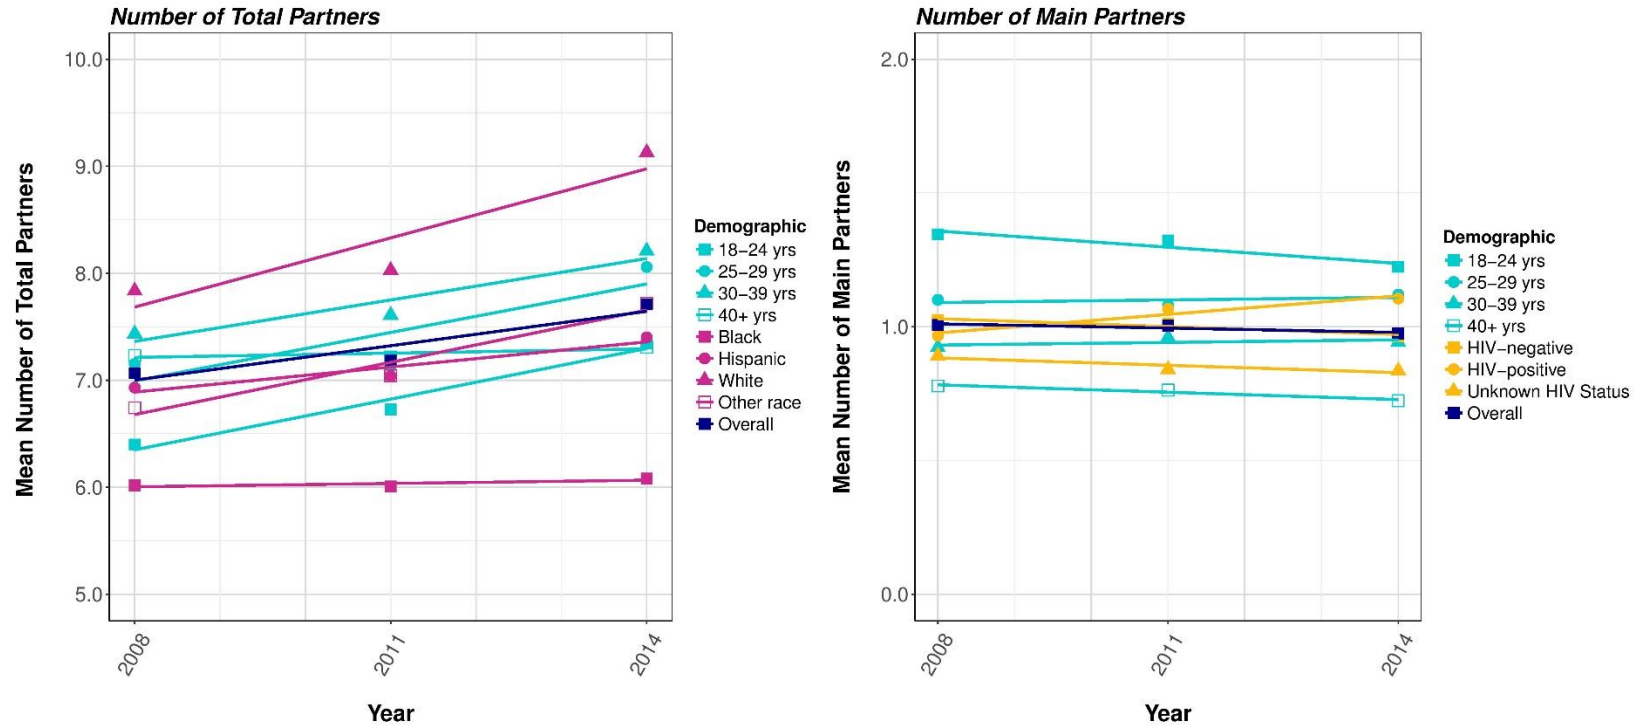

### Notes:

1. Overall trends are shown in dark blue.
2. Trends for variables with significant interactions with time ( $p < 0.05$ ) are shown as trends stratified by each level of the respective variable. These significant interactions may differ for each outcome.
3. “Black” refers to Black/African American, “Hispanic” refers to Hispanic/Latino, and “Other race” includes American Indian, Alaska Native, Asian, Native Hawaiian, other Pacific Islander, and mixed race. Hispanic/Latinos can be of any race.

**Figure B. Trends in the Proportion of Men Who Have Sex With Men with One Main Partner Only or with Both Main and Casual Partners in the Past 12 Months—National HIV Behavioral Surveillance, 21 cities, United States, 2008-2014**

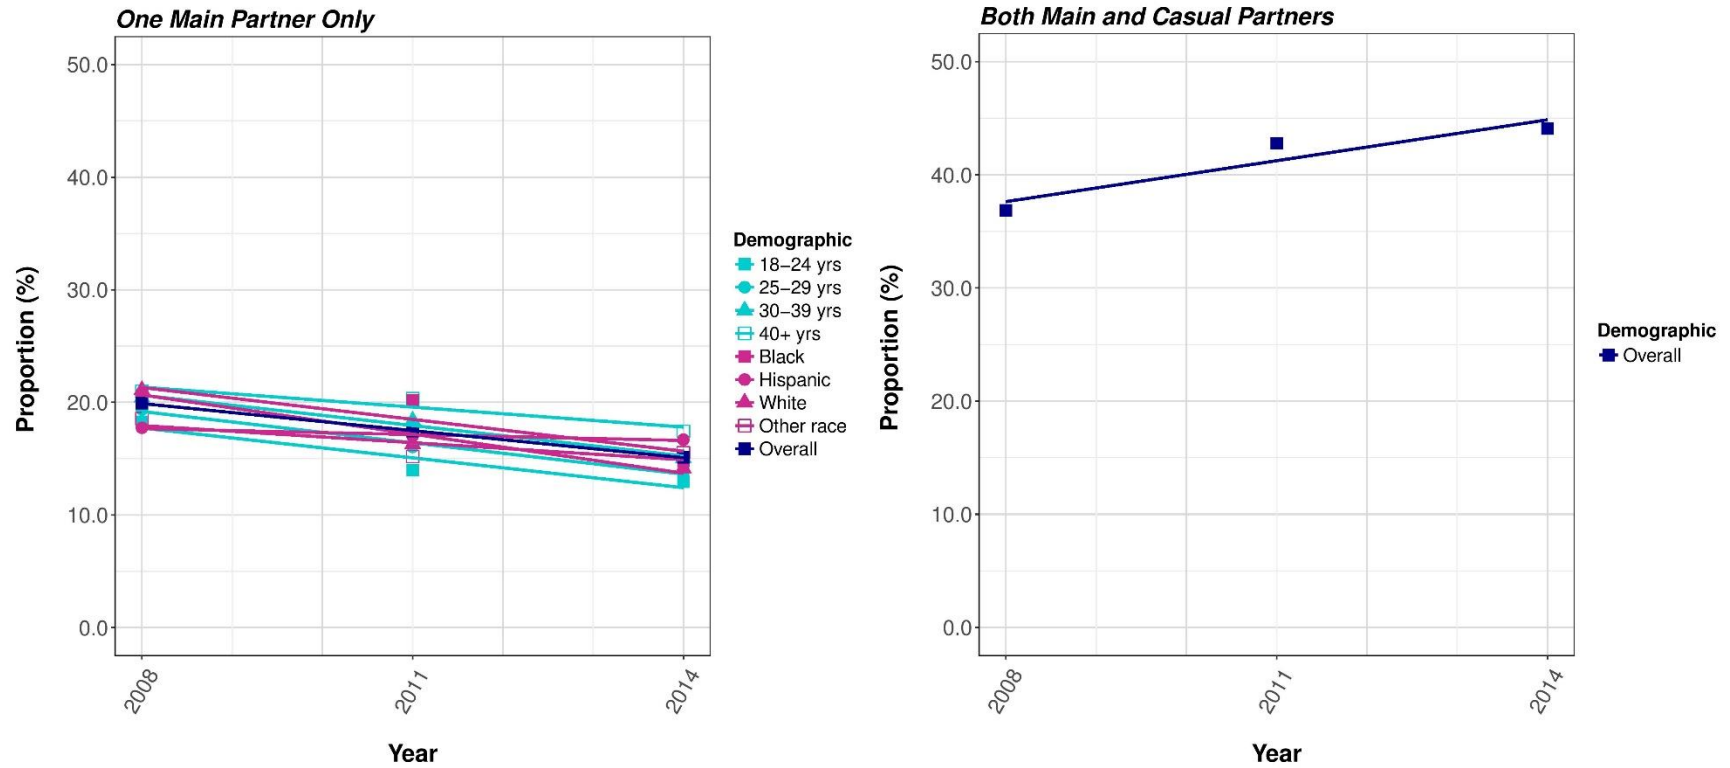

**Notes:**

1. Overall trends are shown in dark blue.
2. Trends for variables with significant interactions with time ( $p < 0.05$ ) are shown as trends stratified by each level of the respective variable. These significant interactions may differ for each outcome.
3. “Black” refers to Black/African American, “Hispanic” refers to Hispanic/Latino, and “Other race” includes American Indian, Alaska Native, Asian, Native Hawaiian, other Pacific Islander, and mixed race. Hispanic/Latinos can be of any race.

**Table A. Trends in Condomless Anal Sex by Partner Typology among Men Who Have Sex With Men—  
National HIV Behavioral Surveillance, 21 cities, United States, 2008-2014**

| CONDOMLESS ANAL SEX AMONG MSM WITH ONE MAIN <sup>4,5</sup> PARTNER ONLY IN PAST 12 MONTHS                       |      |               |      |               |      |                                                     |        |            |                                |
|-----------------------------------------------------------------------------------------------------------------|------|---------------|------|---------------|------|-----------------------------------------------------|--------|------------|--------------------------------|
| 2008 (N=1841)                                                                                                   |      | 2011 (N=1608) |      | 2014 (N=1448) |      | Overall (N=4897)                                    |        |            |                                |
|                                                                                                                 |      |               |      |               |      | Estimated<br>Round Percent<br>Change <sup>1,2</sup> | 95% CI | P-value    | Inter. <sup>3</sup><br>P-value |
|                                                                                                                 | n    | %             | n    | %             | n    | %                                                   |        |            |                                |
| <b>Age (yrs)</b>                                                                                                |      |               |      |               |      |                                                     |        |            | 0.35                           |
| 18-24                                                                                                           | 199  | 52.8          | 168  | 51.2          | 173  | 68.4                                                | 13.7   | 6.4, 21.5  | <0.01                          |
| 25-29                                                                                                           | 201  | 60.7          | 161  | 57.5          | 209  | 72.3                                                | 9.7    | 3.2, 16.5  | <0.01                          |
| 30-39                                                                                                           | 286  | 54.7          | 250  | 62.3          | 259  | 69.8                                                | 12.9   | 7.0, 19.2  | <0.01                          |
| ≥40                                                                                                             | 290  | 47.5          | 318  | 53.1          | 286  | 53.5                                                | 6.4    | 0.5, 12.7  | 0.03                           |
| <b>Race/Ethnicity</b>                                                                                           |      |               |      |               |      |                                                     |        |            | 0.95                           |
| Black/African American                                                                                          | 193  | 43.1          | 217  | 43.3          | 200  | 50.9                                                | 9.2    | 1.4, 17.5  | 0.02                           |
| Hispanic/Latino <sup>7</sup>                                                                                    | 219  | 55.4          | 258  | 63.1          | 297  | 70.6                                                | 11.5   | 5.6, 17.7  | <0.01                          |
| White                                                                                                           | 492  | 58.0          | 362  | 60.7          | 362  | 69.8                                                | 10.0   | 5.2, 15.1  | <0.01                          |
| Other <sup>8</sup>                                                                                              | 72   | 48.3          | 60   | 58.8          | 68   | 59.1                                                | 12.3   | 1.0, 24.9  | 0.03                           |
| <b>Self-reported HIV status</b>                                                                                 |      |               |      |               |      |                                                     |        |            | 0.95                           |
| HIV-negative                                                                                                    | 782  | 55.3          | 719  | 58.6          | 739  | 68.1                                                | 10.5   | 6.8, 14.4  | <0.01                          |
| HIV-positive                                                                                                    | 91   | 44.8          | 90   | 40.5          | 126  | 48.7                                                | 8.8    | -1.7, 20.4 | 0.10                           |
| Unknown                                                                                                         | 103  | 46.2          | 88   | 55.7          | 62   | 60.2                                                | 11.4   | 0.2, 23.7  | 0.04                           |
| <b>Total</b>                                                                                                    | 976  | 53.0          | 897  | 55.8          | 927  | 64.0                                                | 10.4   | 6.9, 13.9  | <0.01                          |
| CONDOMLESS ANAL SEX AMONG MSM WITH<br>BOTH MAIN <sup>5</sup> AND CASUAL <sup>6</sup> PARTNERS IN PAST 12 MONTHS |      |               |      |               |      |                                                     |        |            |                                |
| 2008 (N=3406)                                                                                                   |      | 2011 (N=3941) |      | 2014 (N=4219) |      | Overall (N=11566)                                   |        |            |                                |
|                                                                                                                 |      |               |      |               |      | Estimated<br>Round Percent<br>Change <sup>1,2</sup> | 95% CI | P-value    | Inter. <sup>3</sup><br>P-value |
|                                                                                                                 | n    | %             | n    | %             | n    | %                                                   |        |            |                                |
| <b>Age (yrs)</b>                                                                                                |      |               |      |               |      |                                                     |        |            | 0.75                           |
| 18-24                                                                                                           | 625  | 69.5          | 861  | 71.5          | 784  | 77.4                                                | 5.7    | 2.8, 8.6   | <0.01                          |
| 25-29                                                                                                           | 552  | 73.7          | 629  | 75.4          | 866  | 80.8                                                | 5.2    | 2.5, 8.0   | <0.01                          |
| 30-39                                                                                                           | 658  | 69.0          | 688  | 73.7          | 884  | 79.6                                                | 7.1    | 4.3, 10.0  | <0.01                          |
| ≥40                                                                                                             | 514  | 63.9          | 657  | 67.7          | 749  | 73.1                                                | 6.9    | 3.4, 10.5  | <0.01                          |
| <b>Race/Ethnicity</b>                                                                                           |      |               |      |               |      |                                                     |        |            | 0.74                           |
| Black/African American                                                                                          | 479  | 64.9          | 652  | 64.9          | 790  | 71.3                                                | 5.0    | 1.5, 8.6   | <0.01                          |
| Hispanic/Latino <sup>7</sup>                                                                                    | 624  | 70.3          | 802  | 75.1          | 886  | 79.8                                                | 6.2    | 3.4, 9.0   | <0.01                          |
| White                                                                                                           | 1035 | 70.3          | 1168 | 74.5          | 1336 | 80.7                                                | 7.0    | 4.8, 9.3   | <0.01                          |
| Other <sup>8</sup>                                                                                              | 211  | 68.5          | 213  | 70.5          | 271  | 78.6                                                | 7.6    | 2.8, 12.7  | <0.01                          |

– Table A continued –

– Table A continued –

| <b>Self-reported HIV status</b> |             |             |             |             |             |             |            |                 |                 |      |
|---------------------------------|-------------|-------------|-------------|-------------|-------------|-------------|------------|-----------------|-----------------|------|
| HIV-negative                    | 1823        | 68.7        | 2223        | 71.5        | 2548        | 77.3        | 6.4        | 4.6, 8.3        | <0.01           | 0.30 |
| HIV-positive                    | 292         | 69.0        | 408         | 76.4        | 570         | 81.0        | 8.1        | 4.3, 12.1       | <0.01           |      |
| Unknown                         | 234         | 71.3        | 204         | 68.2        | 165         | 75.0        | 2.6        | -2.8, 8.4       | 0.35            |      |
| <b>Total</b>                    | <b>2349</b> | <b>69.0</b> | <b>2835</b> | <b>71.9</b> | <b>3283</b> | <b>77.8</b> | <b>6.3</b> | <b>4.7, 8.0</b> | <b>&lt;0.01</b> |      |

<sup>1</sup>Estimated Round Percent Change = estimated 3-year percent change in number of partners.

<sup>2</sup>ERPC is adjusted for age, race, HIV status, and city and accounts for clustering by recruitment event.

<sup>3</sup>Interaction p-value.

<sup>4</sup>“Only 1 main partner” refers to MSM reporting only 1 main partner and 0 casual partners in the past year.

<sup>5</sup>Main partners refer to “men with whom the participant has had sex and feels committed to above anyone else.”

<sup>6</sup>Casual partners refer to “men with whom the participant has had sex yet does not feel committed to or does not know very well.”

<sup>7</sup>Hispanics/Latinos can be of any race.

<sup>8</sup>Other races include American Indian, Alaska Native, Asian, Native Hawaiian, other Pacific Islander, and mixed race.
